# Supplementary material for: Mapping Brain Lesions to Language deficits in Aphasia: Evidence from Kenyan Hospitals
Source: Research Square preprint supplement (doi:10.21203/rs.3.rs-6922576/v1), 2025-09-04
Supplement: Supplementary file 1 [file c27305b195238f9046811a72.pdf]

## APPENDICES

### APPENDIX I: INTRODUCTORY LETTER

Dear Respondent,

I am Mercyrose Jesang, a researcher conducting a study titled *"Brain and Language: An Analysis of Language Processing In Aphasia Among Adults In Tier Four Hospitals, Nakuru Kenya"*. This study is part of my academic research and aims to understand the nature and extent of language production impairments in individuals with aphasia in our community. Through this research, I hope to identify key factors contributing to the prevalence of aphasia in Nakuru County and analyze the linguistic features most affected by the condition.

Your participation is crucial for the success of this study. You have been selected due to your experience with language production difficulties, and your input will provide valuable insights into the daily communication challenges faced by individuals with aphasia. The information you share will help inform effective language rehabilitation strategies and could contribute to improving the quality of care provided in local healthcare facilities.

Please be assured that your responses will remain strictly confidential. No personal information that could identify you will be disclosed. Your participation is voluntary, and you may withdraw at any time if you feel uncomfortable continuing.

Thank you very much for considering this invitation. Your contribution to this research will be invaluable in advancing our understanding of aphasia and its impact on language production within our community.

Sincerely,

Mercyrose Jesang

Principal Investigator

I have read and understood that my participation is crucial. I hereby append my signature for participation.

Respondent:

Sign

Date

*[Signature]*  
11/04/2025

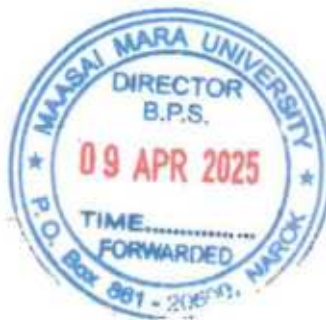

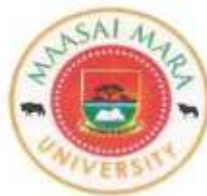

**MAASAI MARA UNIVERSITY**  
**BOARD OF POSTGRADUATE STUDIES**  
**OFFICE OF THE DIRECTOR**

P.O. BOX 861 – 20500  
Narok, Kenya [www.mmarau.ac.ke](http://www.mmarau.ac.ke)

Tel: +254 – 20 -2066042  
+254 – 20 - 8081874

27<sup>th</sup> March, 2025

Research Permits Section  
NACOSTI  
UTALII HOUSE

**REF: MERCYROSE JESANG REG. NO. AP05/SP/MN/19488/2022**

We wish to confirm that the above named is a *bona fide* PhD. student at Maasai Mara University pursuing a Doctor of Philosophy in Linguistics Degree in the School of Arts, Humanities Social Sciences & Creative Industries. Her Research Proposal is '*An Analysis of Language Processing in Aphasia among Adults in Select Tier Four Hospitals, Nakuru County, Kenya*'. Ms. Jesang wishes to apply for a research permit from NACOSTI before she can proceed for field work and data collection.

We further confirm that the candidate has adhered to all research protocol requirements of Maasai Mara University and the proposed research has been rated as having no known adverse impacts on the environment and does not pose any ethical concerns.

This is therefore to request your office to issue her with a research permit.

Yours Sincerely,  
MAASAI MARA UNIVERSITY  
P. O. Box 861 - 20500  
NAROK  
27 MAR 2025  
Prof. Beatrice Manyasi, PhD.  
DIRECTOR, BOARD OF POSTGRADUATE STUDIES  
BOARD OF POSTGRADUATE STUDIES



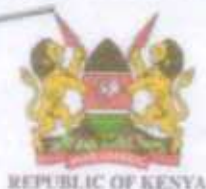

REPUBLIC OF KENYA

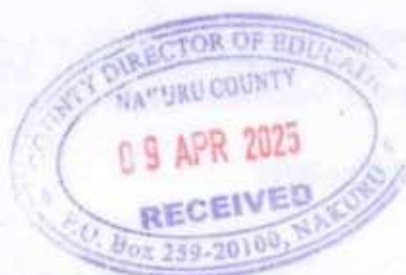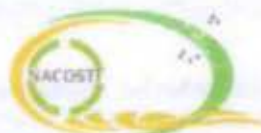

NATIONAL COMMISSION FOR  
SCIENCE, TECHNOLOGY & INNOVATION

Ref No: 814455

Date of Issue: 08/April/2025

## RESEARCH LICENSE

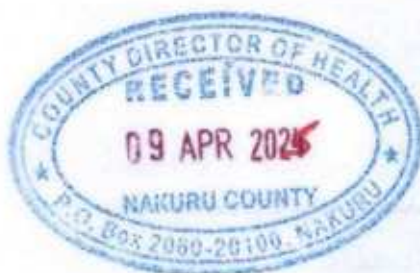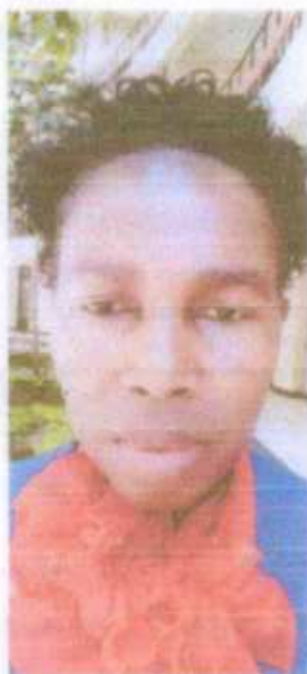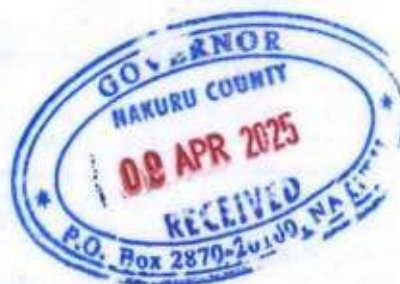

This is to Certify that Ms. MERCYROSE J JESANG of Maasai Mara University, has been licensed to conduct research as per the provision of the Science, Technology and Innovation Act, 2013 (Rev.2014) in Nakuru on the topic: BRAIN AND LANGUAGE: AN ANALYSIS OF LANGUAGE PROCESSING IN APHASIA AMONG ADULTS IN SELECT TIER FOUR HOSPITALS, NAKURU COUNTY, KENYA for the period ending : 08/April/2026.

License No: NACOSTI/P/25/417895

814455

Applicant Identification Number

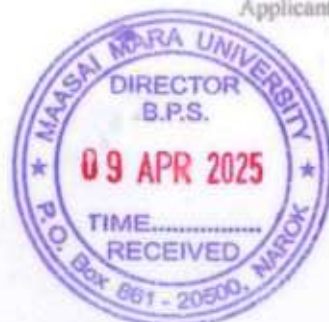

*Walter Wanjau*

Director General  
NATIONAL COMMISSION FOR  
SCIENCE, TECHNOLOGY &  
INNOVATION

Verification QR Code

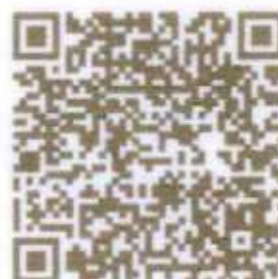

NOTE: This is a computer generated License. To verify the authenticity of this document,  
Scan the QR Code using QR scanner application.

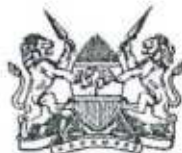

**MINISTRY OF EDUCATION**  
**State Department for Basic Education**

Telephone: 0722810864

Email: [cdenakurucounty@gmail.com](mailto:cdenakurucounty@gmail.com)

COUNTY DIRECTOR OF EDUCATION,  
NAKURU COUNTY  
P.O BOX 259  
**NAKURU**

*When replying please Quote:*

**Ref No. CDE/NKU/GEN/4/1/21 VOL IV/III**

**Date: 9<sup>th</sup> April, 2025**

TO WHOM IT MAY CONCERN

**RE: RESEARCH AUTHORIZATION – MERCYROSE J. JESANG**

Reference is made to the abovenamed individual letter dated 9<sup>th</sup> April, 2025 seeking permission to conduct research in Nakuru County having been approved by NACOSTI through Research Reference No. 814455 and license No. NACOSTI/P/25/417895 dated 8<sup>th</sup> April, 2025.

Permission is hereby granted to her to carry out research on topic "BRAIN AND LANGUAGE: AN ANALYSIS OF LANGUAGE PROCESSING IN APHASIA AMONG ADULTS IN SELECTED TIER FOUR HOSPITALS IN NAKURU COUNTY, KENYA" for the period ending 8<sup>th</sup> April, 2026.

The findings of the research to be shared with this office when through with the research.

Kindly accord her the necessary assistance

**VICTORIA MULILI**  
COUNTY DIRECTOR OF EDUCATION  
NAKURU

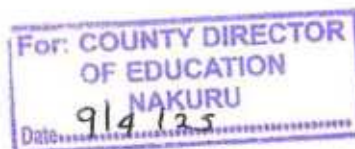

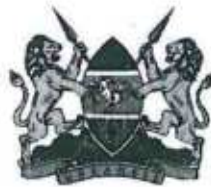

**OFFICE OF THE PRESIDENT**  
**Ministry of Interior and National Administration**

Email: [ccnakurucounty@yahoo.com](mailto:ccnakurucounty@yahoo.com)  
[ccnakurucounty@gmail.com](mailto:ccnakurucounty@gmail.com)

COUNTY COMMISSIONER  
NAKURU COUNTY  
P.O. BOX 81  
NAKURU

**When replying please quote:**  
**Ref: CC.SR.EDU.12/1/2/ VOL.VIII/73**

**9<sup>th</sup> April, 2025**

Deputy County Commissioners  
**NAKURU COUNTY**

**RE: RESEARCH AUTHORIZATION – MS. MERCYROSE J.JESANG**

The above subject matter refers.

This is to confirm that the above named from Maasai Mara University has been licensed to conduct research as per the provision of Science, Technology and Innovation Act, 2013(Rev.2014) on topic: **‘Brain And Language an Analysis of Language Processing in Aphasia Among Adults In Select Tier Four Hospitals’**, in Nakuru County ” for the period ending **8<sup>th</sup> April, 2026**. NACOSTI Licence No. **NACOSTI/P/25/417056**.

Please accord her all the necessary support to facilitate the success of her research.

**A.C. CHEPKECH**  
**FOR: COUNTY COMMISSIONER**  
**NAKURU COUNTY**



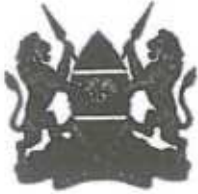

REPUBLIC OF KENYA  
COUNTY GOVERNMENT OF NAKURU  
DEPARTMENT OF HEALTH SERVICES

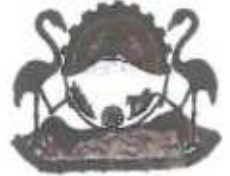

Office of the County Director Public Health  
P.O. Box 2060-20100  
Nakuru, Kenya

Email: [info.health@nakuru.go.ke](mailto:info.health@nakuru.go.ke)  
Website: [www.nakuru.go.ke](http://www.nakuru.go.ke)

REF: CGN/CDPH/RES/2025/1139

20<sup>th</sup> May, 2025

To  
Mercy Rose J. Jesang  
Maasai Mara University

**RE: AUTHORIZATION TO CONDUCT RESEARCH**

This letter serves as an authorization from the County Department of Health Services Nakuru for you to conduct research in Nakuru on the topic "*Brain and Language: An Analysis of Language Processing in Aphasia Among Adults in select Tier Four Hospitals, Nakuru County, Kenya*".

Please note that this approval is subject to adherence to the reasonable ethical considerations and the prevailing rules and regulations governing research work. This research will be for academic purpose.

By a copy of this letter, all Medical Superintendents are requested to accord all the necessary support.

Thank you.

ELIZABETH KIPTOO  
COUNTY DIRECTOR, PUBLIC HEALTH  
NAKURU

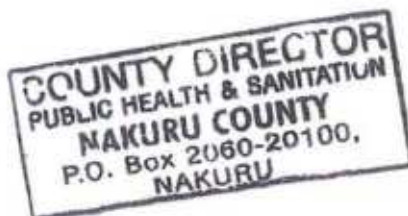

**Copy to:**

- Medical Superintendents  
NAKURU

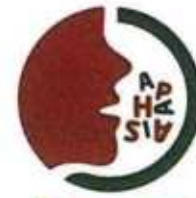

**National  
Aphasia  
Association**

**Ambassador Program**



**AMBASSADOR**

# **CERTIFICATE**

This Certificate is Awarded to

**Mercy Rose Jesang**

In recognition of having completed training and having met all the requirements of the NAA Ambassador Program, this individual is awarded status as a qualified Ambassador.

As an Ambassador, this individual will promote public education and awareness of aphasia on behalf of the National Aphasia Association.

[www.aphasia.org](http://www.aphasia.org)

*Maura Silverman*

**Maura Silverman**

NAA Executive  
Director

*Dr. Jackie Hinckley*

**Jackie Hinckley**

NAA Board Chair

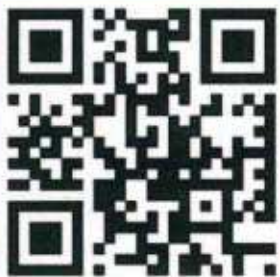

Date: June 2, 2025



# Certified Aphasia Ambassador

**Mercy Rose J Jesang**

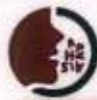

**National  
Aphasia  
Association**

Ambassador Program

[www.aphasia.org](http://www.aphasia.org)

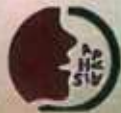

**National  
Aphasia  
Association**

[www.aphasia.org](http://www.aphasia.org)

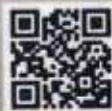

**APHASIA ID**

**MERCY**

**JESANG KEMBOI**

*Person with aphasia*

Date Issued:  
10/19/2022

Aphasia is an impairment of language, not of intellect. Aphasia can affect a person's speech and their ability to read or write and is usually the result of a stroke or another brain injury. People with aphasia have trouble communicating.

The following tips help:

- Please be patient with me.
- Please speak slowly and in a normal voice. No need to shout!
- Try to avoid loud places or places with a lot of background noise.

Thank you very much for your patience and understanding.

Visit [aphasia.org](http://aphasia.org) for more information and aphasia-friendly resources.

Made at [www.aphasiaID.com](http://www.aphasiaID.com)

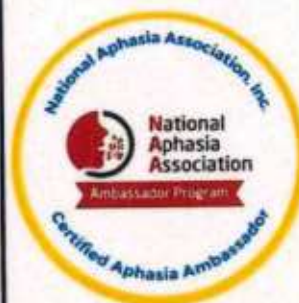

**Mercy Rose J Jesang**

PhD, Linguistics - Masai Mara University - Kenya

**NAA Ambassador - Africa**
